# Supplementary material for: Mcm10 promotes rapid isomerization of CMG-DNA for replisome bypass of lagging strand DNA blocks
Source: eLife journal article supplement (doi:10.7554/elife.29118), 2017-09-04
Supplement: supp [file elife-29118-supp-v1.zip]

Archive with 9 entries (9 files):
- elife_poa_e29118_Figure_2_figure_supplement_2.pdf
- elife_poa_e29118_Figure_2_figure_supplement_5.pdf
- elife_poa_e29118_Figure_2_figure_supplement_3.pdf
- elife_poa_e29118_Figure_6_figure_supplement_1.pdf
- elife_poa_e29118_Figure_5_figure_supplement_1.pdf
- elife_poa_e29118_Transparent_Reporting_File.pdf
- elife_poa_e29118_Figure_3_figure_supplement_1.pdf
- elife_poa_e29118_Figure_2_figure_supplement_4.pdf
- elife_poa_e29118_Figure_2_figure_Supplement_1.pdf
