# Supplementary material for: Mcm10 promotes rapid isomerization of CMG-DNA for replisome bypass of lagging strand DNA blocks
Source: eLife journal article supplement (doi:10.7554/elife.29118), 2017-09-04

# Figure 6 - supplement 1

## Leading strand double-biotinylated oligo

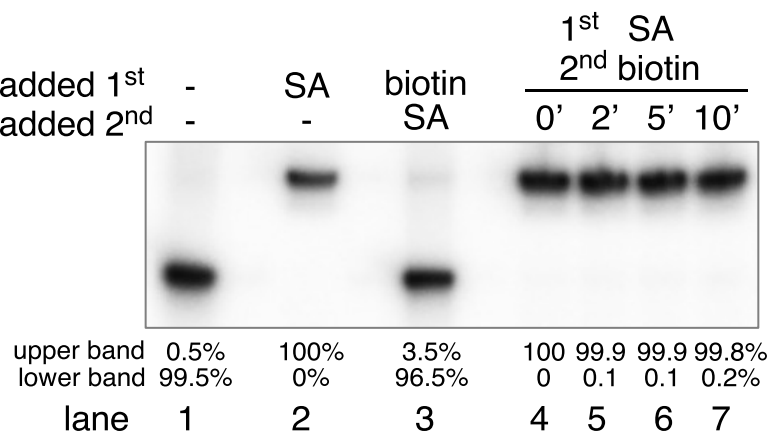

## Lagging strand double-biotinylated oligo

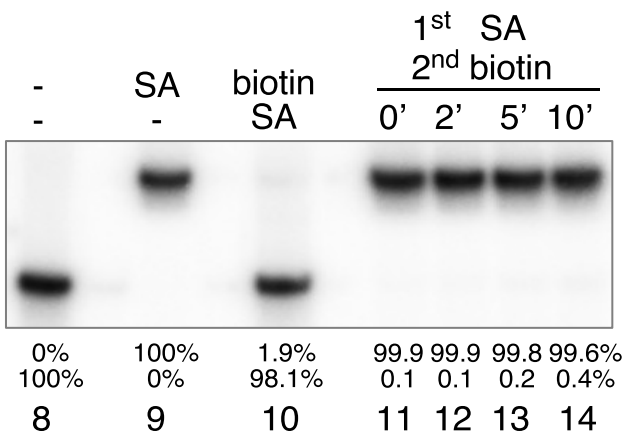

Supplement: supp [file elife-29118-supp-v1.zip › elife_poa_e29118_Figure_6_figure_supplement_1.pdf]
