# Supplementary figures and images for: Mcm10 promotes rapid isomerization of CMG-DNA for replisome bypass of lagging strand DNA blocks
Source: eLife journal article supplement (doi:10.7554/elife.29118), 2017-09-04

## Figure 2 - supplement 2

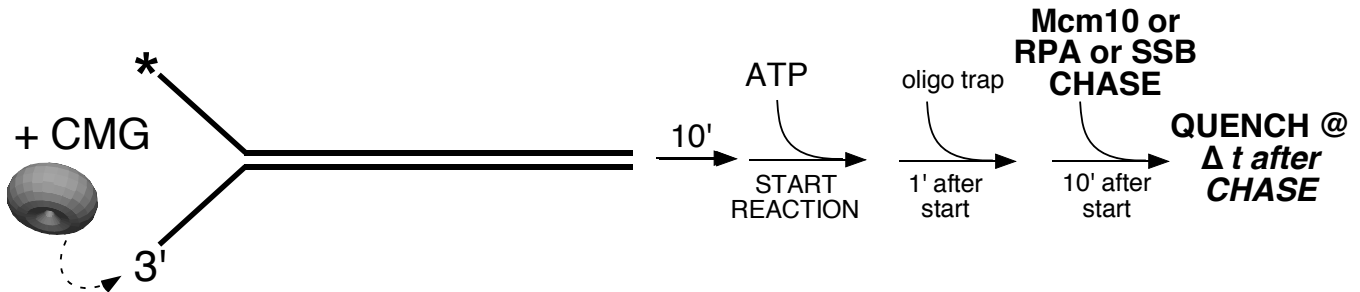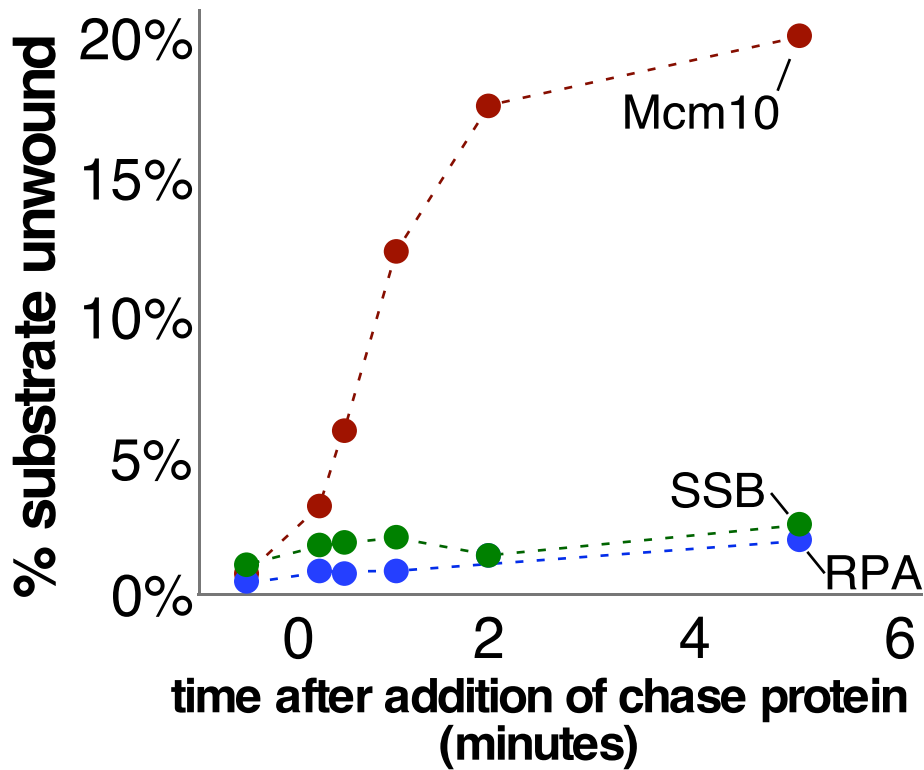

Supplement: supp [file elife-29118-supp-v1.zip › elife_poa_e29118_Figure_2_figure_supplement_2.pdf]

## Figure 2 - supplement 5

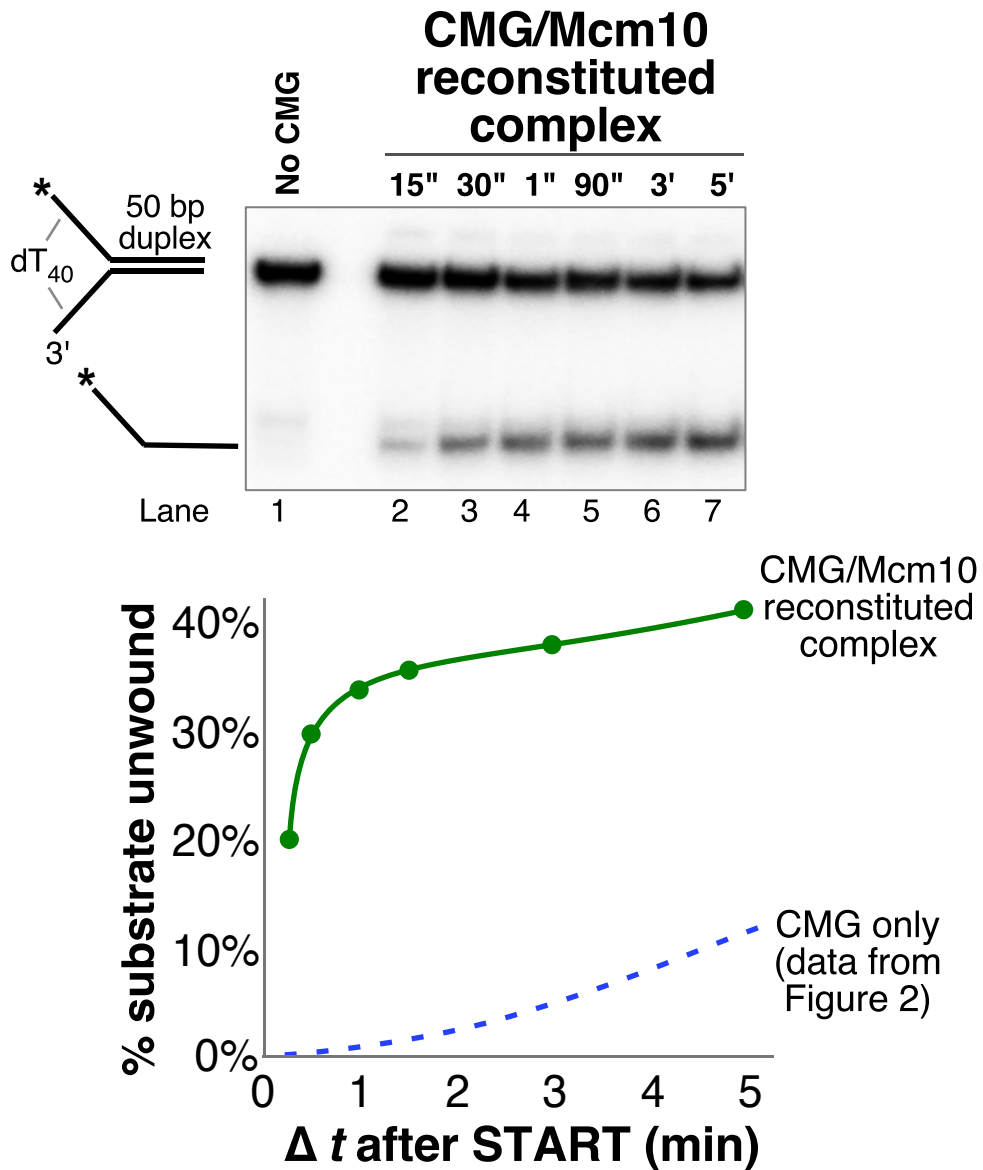

Supplement: supp [file elife-29118-supp-v1.zip › elife_poa_e29118_Figure_2_figure_supplement_5.pdf]

## Figure 2 - supplement 3

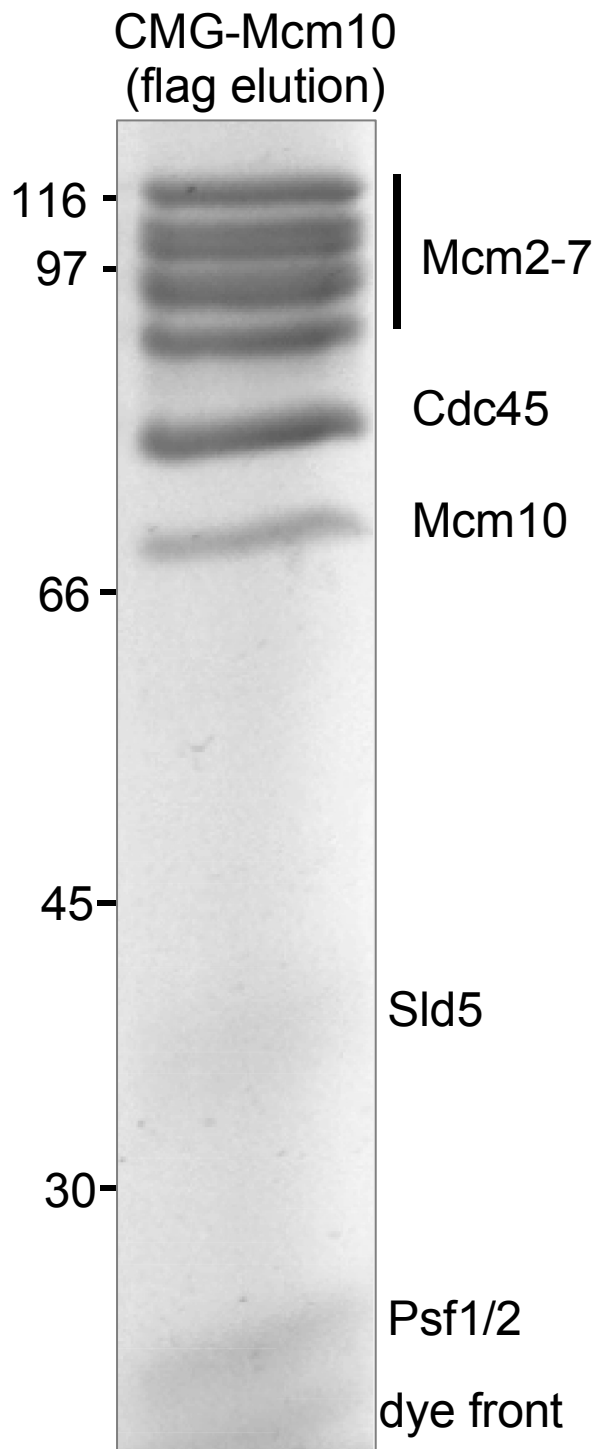

Supplement: supp [file elife-29118-supp-v1.zip › elife_poa_e29118_Figure_2_figure_supplement_3.pdf]

# Figure 5 - supplement 1

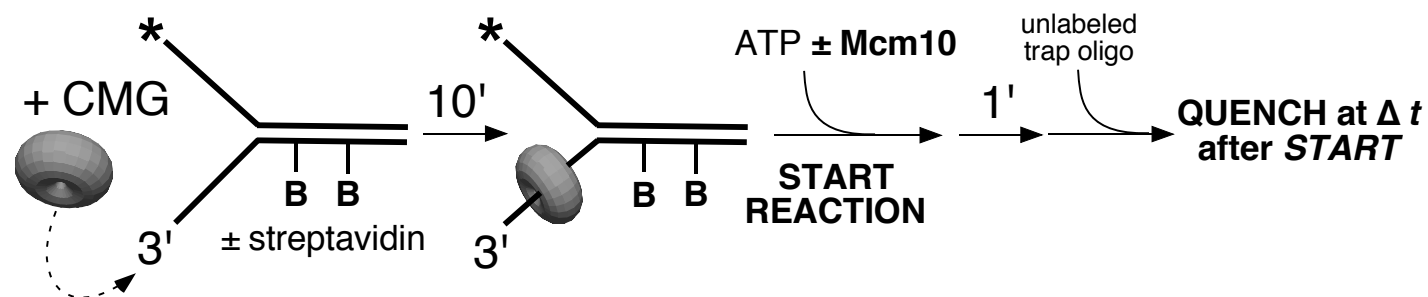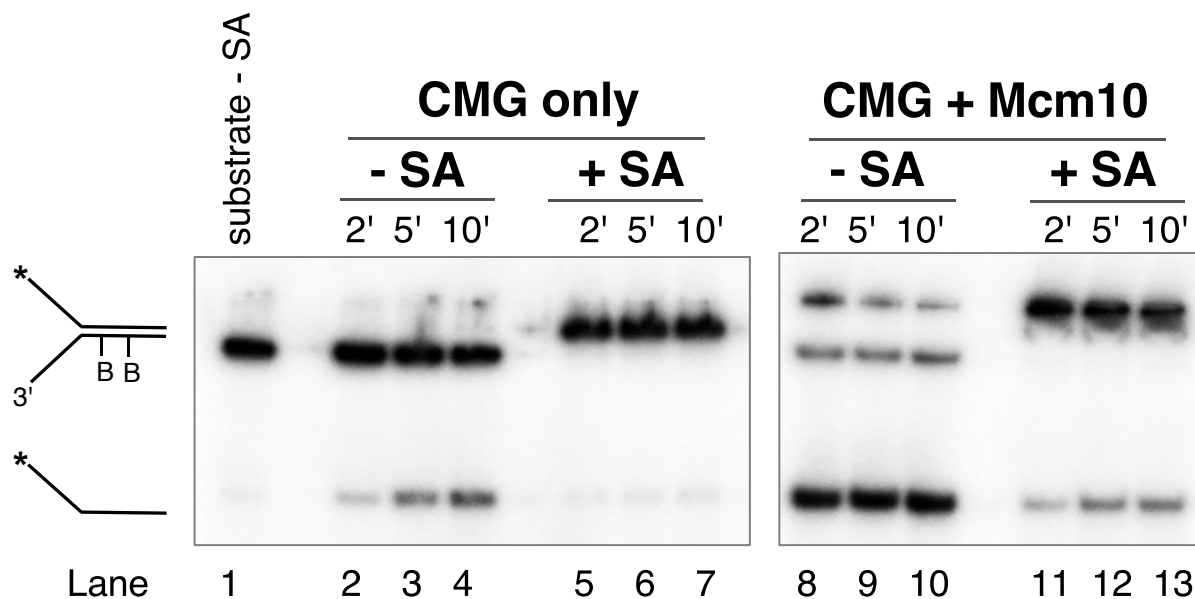

Supplement: supp [file elife-29118-supp-v1.zip › elife_poa_e29118_Figure_5_figure_supplement_1.pdf]

# Figure 3 - supplement 1

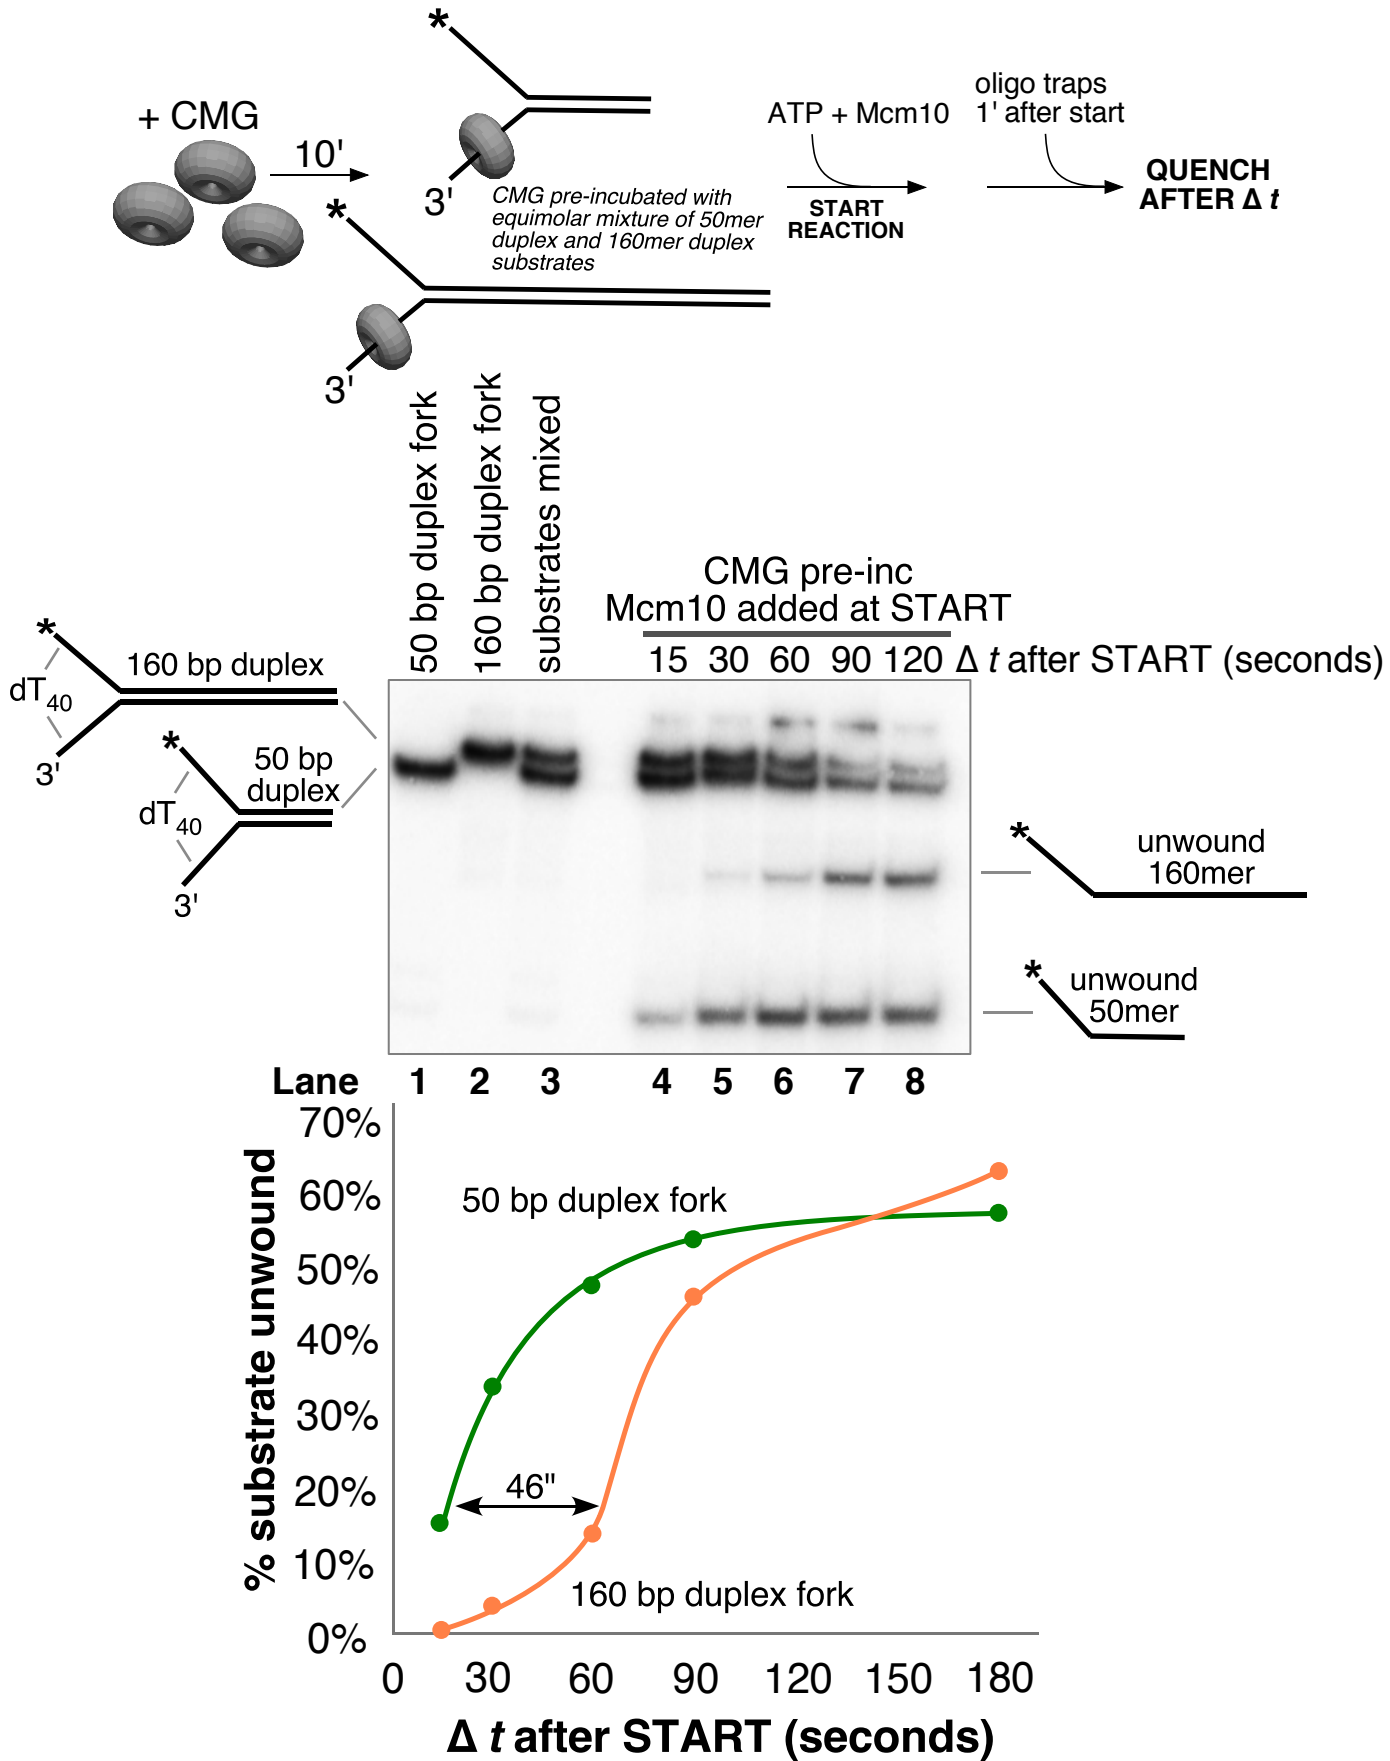

Supplement: supp [file elife-29118-supp-v1.zip › elife_poa_e29118_Figure_3_figure_supplement_1.pdf]

## Figure 2 - supplement 4

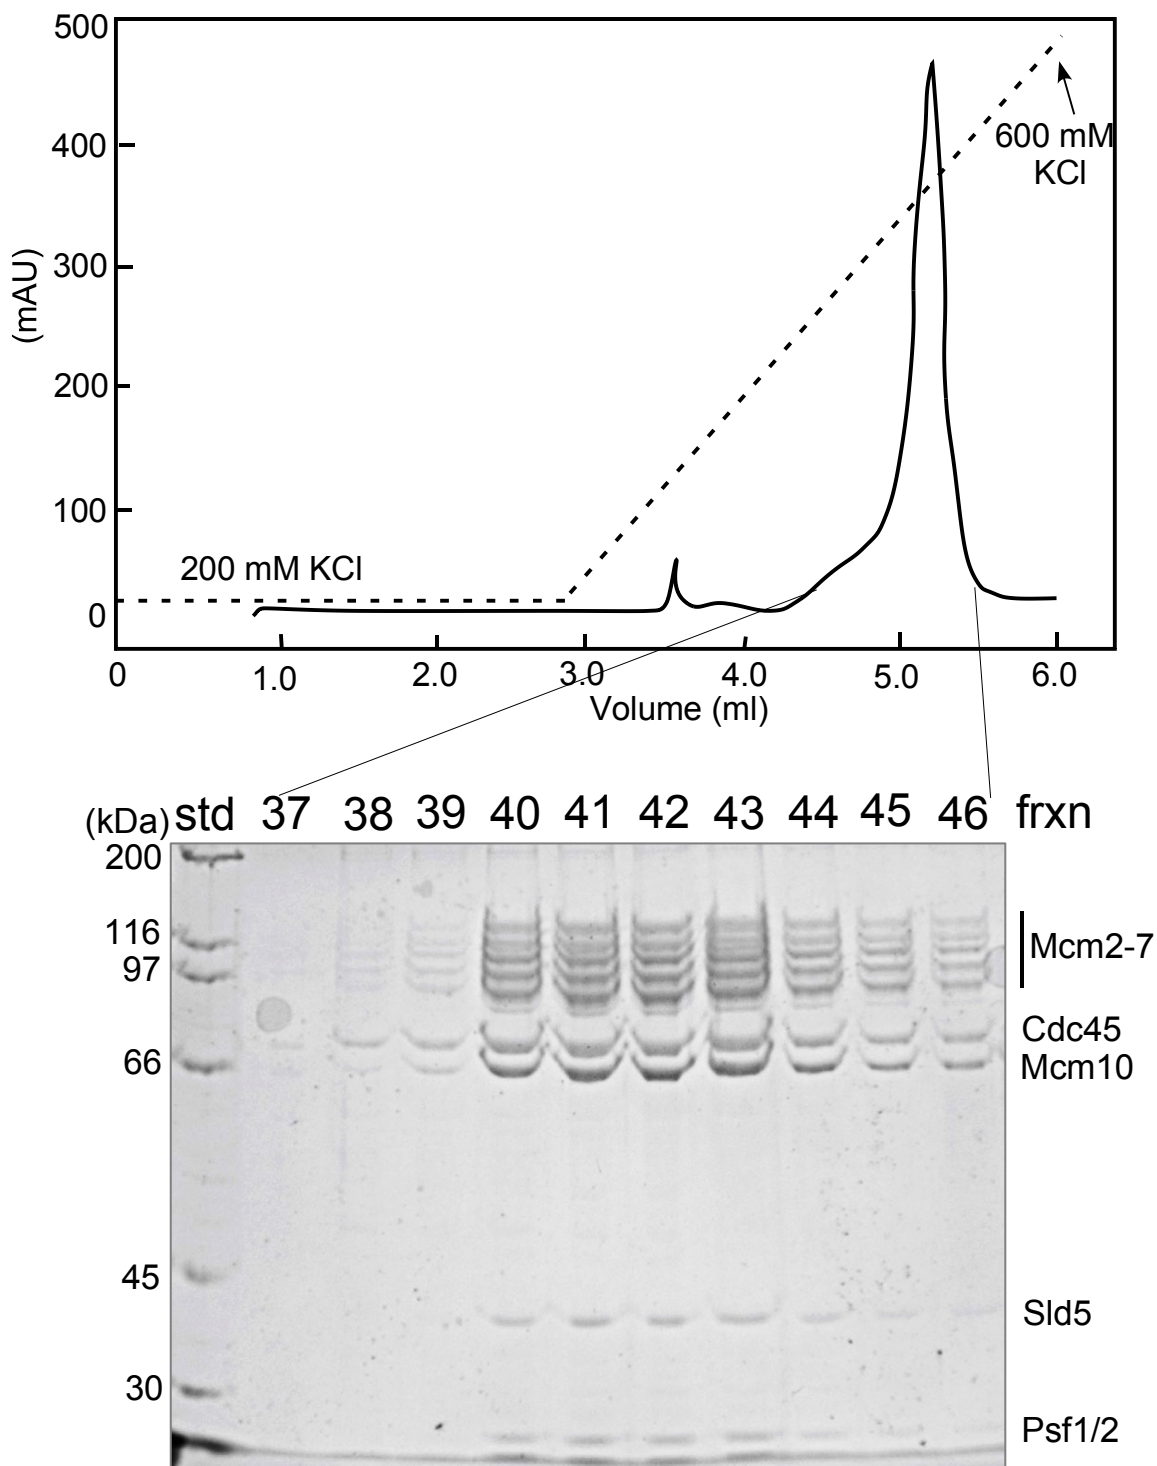

Supplement: supp [file elife-29118-supp-v1.zip › elife_poa_e29118_Figure_2_figure_supplement_4.pdf]

# Figure 2 - supplement 1

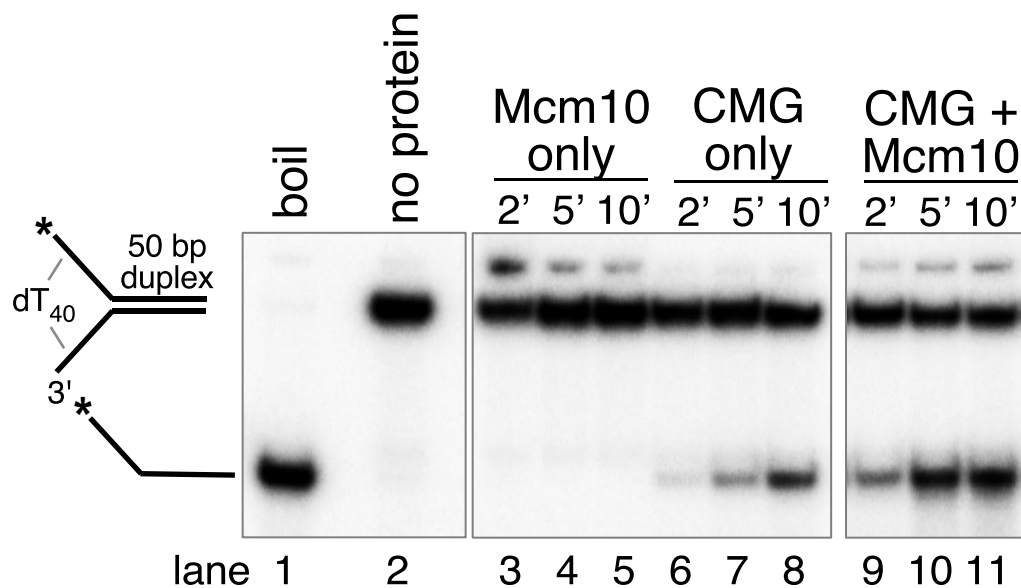

Supplement: supp [file elife-29118-supp-v1.zip › elife_poa_e29118_Figure_2_figure_Supplement_1.pdf]
